# Supplementary material for: A multifunctional nanoporous carbon platform derived from a zeolitic imidazolate framework for sensing and enzyme-like catalysis
Source: Royal Society of Chemistry journal article supplement (doi:10.1039/d4nj01666a), 2024-01-01
Supplement: d4nj01666a1.pdf [file d4nj01666a1.pdf]

## Supporting Information

# A Multifunctional Nanoporous Carbon Platform Derived from Zeolitic Imidazolate Framework for Sensing and Enzyme-like Catalyst

*Lin Lu,<sup>\*a</sup> Xiaojing Li,<sup>b</sup> Junsong Mou,<sup>c</sup> Xiyue Cao,<sup>c</sup> and Jianfei Xia<sup>\*c</sup>*

a. Zibo Normal College, Zibo, Shandong, PR China.

b. Department of Oral Implantology, The Affiliated Hospital of Qingdao University, Qingdao, PR China

c. College of Chemistry and Chemical Engineering, Qingdao Application Technology Innovation Center of Photoelectric Biosensing for Clinical Diagnosis and Treatment, Instrumental Analysis Center of Qingdao University, Qingdao University, Qingdao, PR China.

\* Corresponding author.

E-mail: xiajianfei@126.com

Fax: +86-532-85953280; Tel: 86-532-85953280

## Contents

|                                                                                                                                                                                                                                                                                                         |    |
|---------------------------------------------------------------------------------------------------------------------------------------------------------------------------------------------------------------------------------------------------------------------------------------------------------|----|
| <b>Chemicals and Materials.</b> -----                                                                                                                                                                                                                                                                   | 3  |
| <b>Apparatus and Characterization.</b> -----                                                                                                                                                                                                                                                            | 3  |
| <b>Fig. S1.</b> TEM image of E-Z-800 with large magnification.-----                                                                                                                                                                                                                                     | 4  |
| <b>Fig. S2.</b> XPS spectrum of E-Z-800.-----                                                                                                                                                                                                                                                           | 4  |
| <b>Fig. S3.</b> Raman spectra of Z-800 and E-Z-800.-----                                                                                                                                                                                                                                                | 5  |
| <b>Fig. S4.</b> FT-IR spectrum of E-Z-800.-----                                                                                                                                                                                                                                                         | 5  |
| <b>Fig. S5.</b> (A) SWV curves of 0.1 mM HQ on E-Z-800/GCE at different pH; pH is from 6.4 to 7.6. (B) Corresponding peak currents versus pH. (C) Corresponding peak potentials versus pH.-----                                                                                                         | 6  |
| <b>Fig. S6.</b> (A) SWV curves of 0.1 mM CT on E-Z-800/GCE at different pH; pH is from 6.4 to 7.6. (B) Corresponding peak currents versus pH. (C) Corresponding peak potentials versus pH.-----                                                                                                         | 6  |
| <b>Fig. S7.</b> CVs of 0.1 mM HQ on E-Z-800/GCE with different scan rates in 0.1 M PBS (pH 7.0) solution; Scan rates (from inner to outer) were from 10 to 500 mV·s <sup>-1</sup> .-----                                                                                                                | 7  |
| <b>Fig. S8.</b> The plots of redox peak currents (I <sub>p</sub> ) versus the square root of scan rate.-----                                                                                                                                                                                            | 7  |
| <b>Fig. S9.</b> CVs of 0.1 mM CT on E-Z-800/GCE with different scan rates in 0.1 M PBS (pH 7.0) solution; Scan rates (from inner to outer) were from 10 to 500 mV·s <sup>-1</sup> .-----                                                                                                                | 8  |
| <b>Fig. S10.</b> The plots of redox peak currents (I <sub>p</sub> ) versus the square root of scan rate.-----                                                                                                                                                                                           | 8  |
| <b>Fig. S11.</b> (A) Time-dependent absorbance changes of TMB oxidation catalyzed by variable concentrations of H <sub>2</sub> O <sub>2</sub> in the presence of E-Z-800. (B) Relation curve of the reciprocal of H <sub>2</sub> O <sub>2</sub> concentration and the reciprocal of reaction rate.----- | 9  |
| <b>Fig. S12.</b> (A) Time-dependent absorbance changes of TMB oxidation catalyzed by H <sub>2</sub> O <sub>2</sub> in the presence of variable concentrations of E-Z-800. (B) Relation curve of the concentrations of E-Z-800 and the reaction rate.-----                                               | 9  |
| <b>Fig. S13.</b> Changes of absorbance signals for glucose, fructose, lactose, NaCl and KCl respectively.-----                                                                                                                                                                                          | 10 |
| <b>Fig. S14.</b> Changes of FL intensities for Na <sup>+</sup> , K <sup>+</sup> , Cd <sup>2+</sup> , Zn <sup>2+</sup> , Mn <sup>2+</sup> , Co <sup>2+</sup> , Mg <sup>2+</sup> , Ca <sup>2+</sup> and Fe <sup>3+</sup> respectively.-----                                                               | 10 |

## **Chemicals and Materials**

Zinc nitrate hexahydrate ( $\text{Zn}(\text{NO}_3)_2 \cdot 6\text{H}_2\text{O}$ , 99%) and hydroquinone ( $\text{C}_6\text{H}_6\text{O}_2$ ,  $\geq 99.0\%$ , AR) were ordered from Aladdin Reagent Co., Ltd (Shanghai, China). 2-Methylimidazole ( $\text{C}_4\text{H}_6\text{N}_2$ , 98%) was ordered from Shanghai Macklin Biochemical Co., Ltd (Shanghai, China). Catechol ( $\text{C}_6\text{H}_6\text{O}_2$ ,  $\geq 98.0\%$ , AR), ethanol ( $\text{C}_2\text{H}_5\text{OH}$ ,  $\geq 99.5\%$ ), potassium hydroxide (KOH), hydrogen peroxide ( $\text{H}_2\text{O}_2$ , 30%) were purchased from Sinopharm Chemical Reagent Co., Ltd (Shanghai, China). 3, 3', 5, 5'-Tetramethylbenzidine (TMB,  $\text{C}_{16}\text{H}_{20}\text{N}_2$ ) was ordered from Sangon Biotech (Shanghai) Co., Ltd (Shanghai, China). Nafion solution (5%, DuPont) was diluted into 0.5 wt%. N, N-dimethylformamide,  $\text{Na}_2\text{HPO}_4$ ,  $\text{NaH}_2\text{PO}_4$ , and other reagents were of analytical grade. The water used in this work was deionized water.

## **Apparatus and Characterization**

Transmission electron microscopy (TEM) characterization were performed on JEOL JEM-1200. The surface topography was characterized by using field emission scanning electron microscopy (FESEM, Regulus 8100 Hitachi). Atomic force microscopy (AFM) images were collected by Bruker Multimode 8. X-ray diffraction (XRD) data was obtained by Rigaku D-MAX 2500/PC. The Raman spectra were recorded on Thermo Fisher Scientific Raman Microscope (DXR2) at an excitation wavelength of 532 nm at room temperature. Fourier Transform Infrared Spectrometer (FT-IR, Nicolet™ iS50 FTIR, United States) was used to study the surface groups of the obtained sample. The UV-vis spectra were performed with the UV-vis spectrophotometer (Shimadzu UV-2500, Japan). The fluorescence intensity of GQDs solution was recorded on an F-7000 fluorescence spectrometer (Hitachi, Japan). The electrochemical data were measured by PARSTAT 6000A electrochemical workstation with a traditional three-electrode cell (Princeton Applied Research, United States).

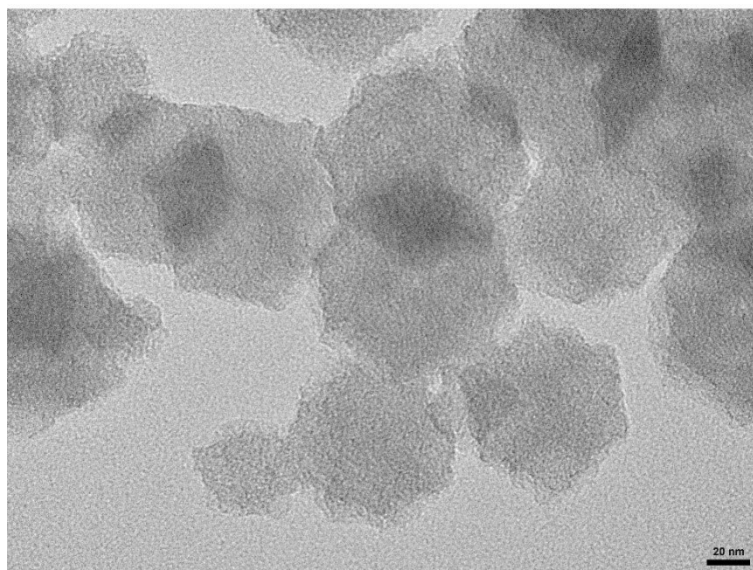

**Fig. S1.** TEM image of E-Z-800 with large magnification.

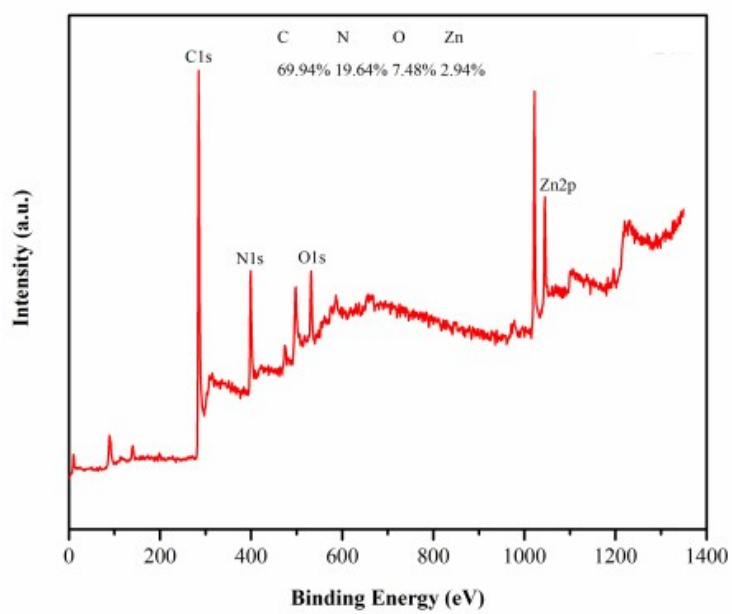

**Fig. S2.** XPS spectrum of E-Z-800.

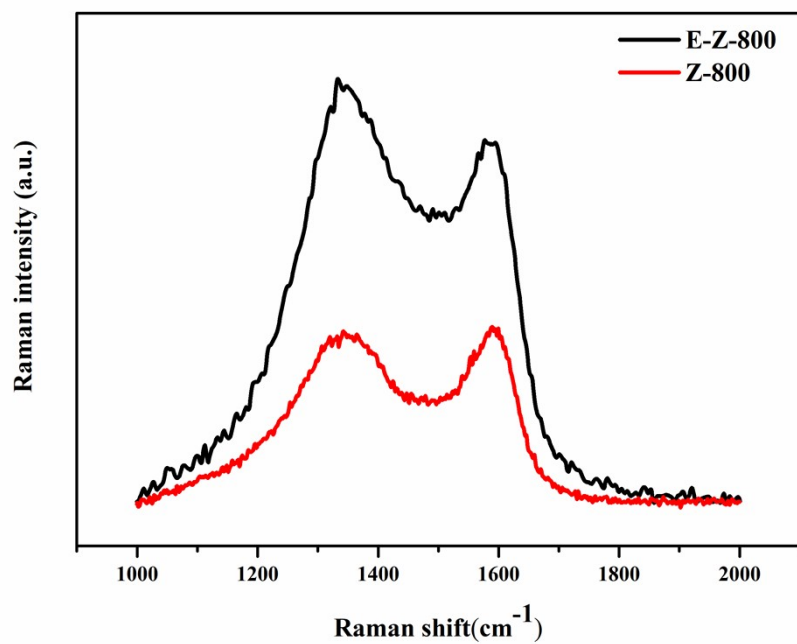

**Fig. S3.** Raman spectra of Z-800 and E-Z-800.

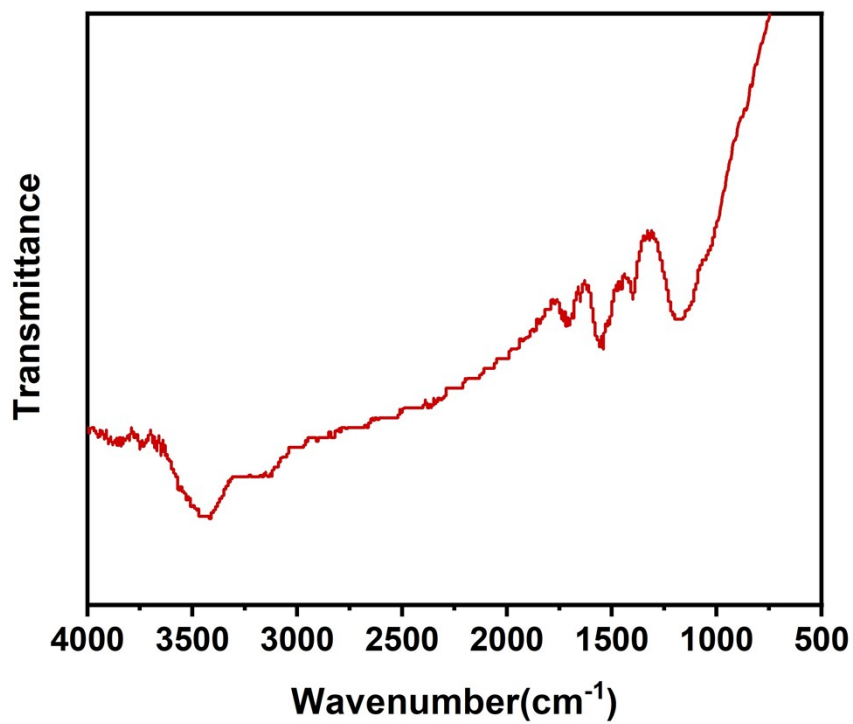

**Fig. S4.** FT-IR spectrum of E-Z-800.

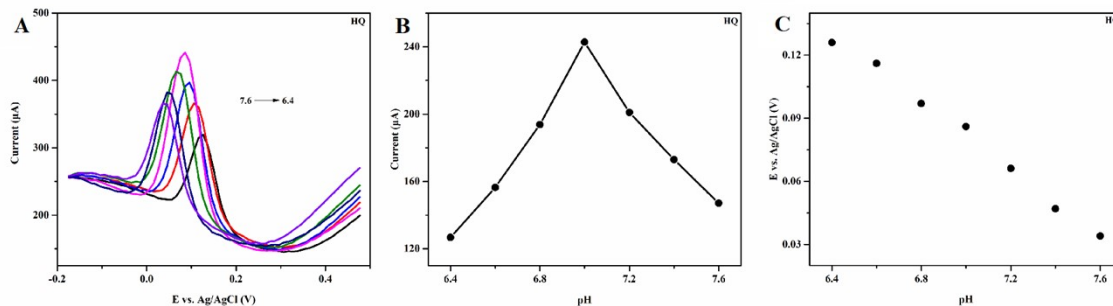

**Fig. S5.** (A) SWV curves of 0.1 mM HQ on E-Z-800/GCE at different pH; pH is from 6.4 to 7.6. (B) Corresponding peak currents versus pH. (C) Corresponding peak potentials versus pH.

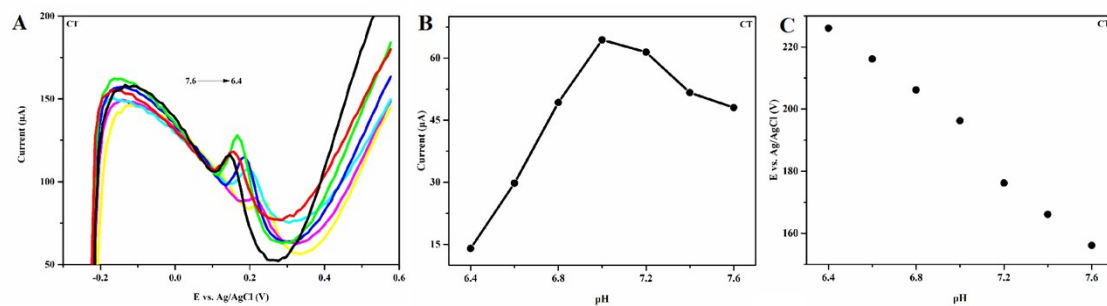

**Fig. S6.** (A) SWV curves of 0.1 mM CT on E-Z-800/GCE at different pH; pH is from 6.4 to 7.6. (B) Corresponding peak currents versus pH. (C) Corresponding peak potentials versus pH.

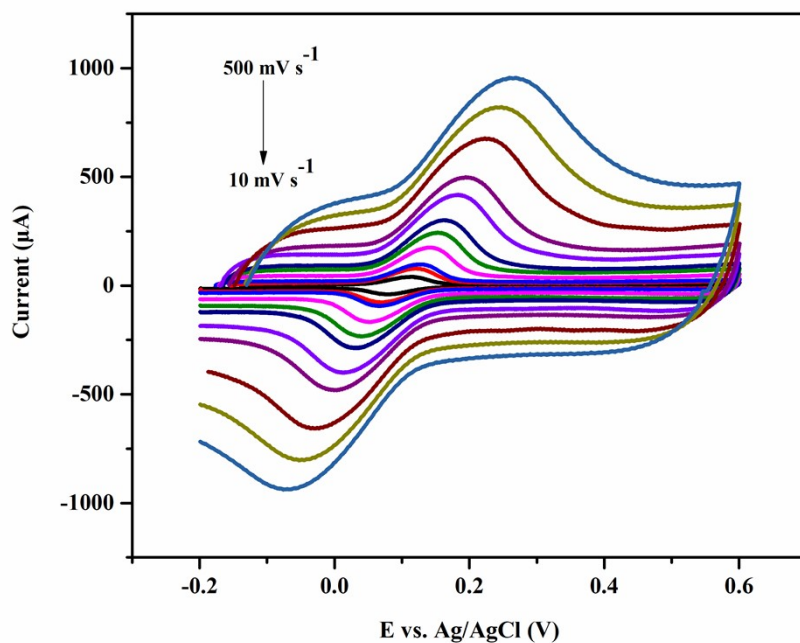

**Fig. S7.** CVs of 0.1 mM HQ on E-Z-800/GCE with different scan rates in 0.1 M PBS (pH 7.0) solution; Scan rates (from inner to outer) were from 10 to 500  $\text{mV}\cdot\text{s}^{-1}$ .

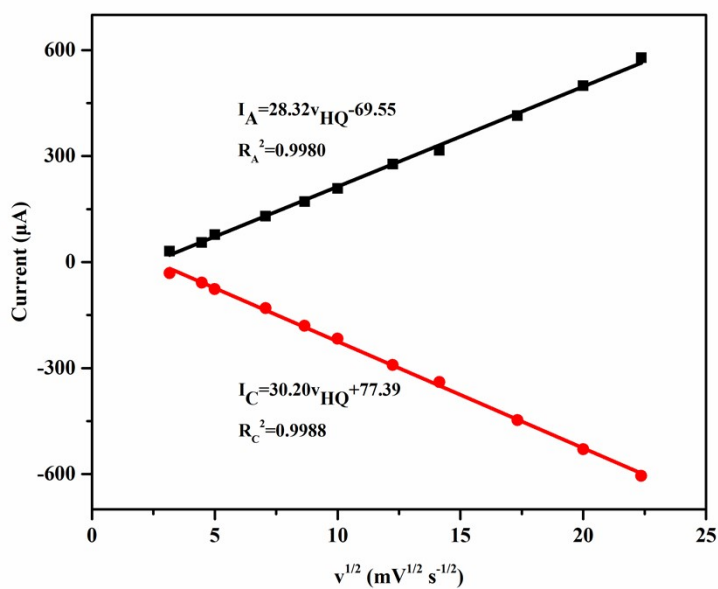

**Fig. S8.** The plots of redox peak currents ( $I_p$ ) versus the square root of scan rate.

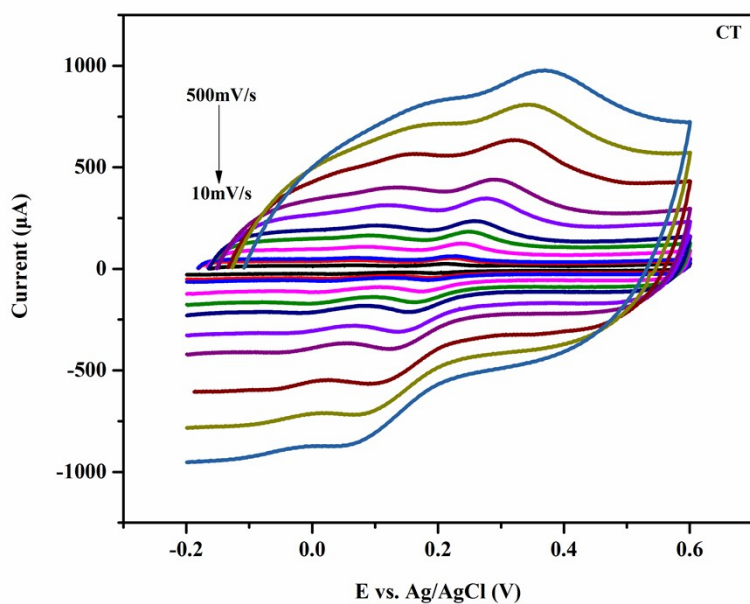

**Fig. S9.** CVs of 0.1 mM CT on E-Z-800/GCE with different scan rates in 0.1 M PBS (pH 7.0) solution; Scan rates (from inner to outer) were from 10 to 500  $\text{mV}\cdot\text{s}^{-1}$ .

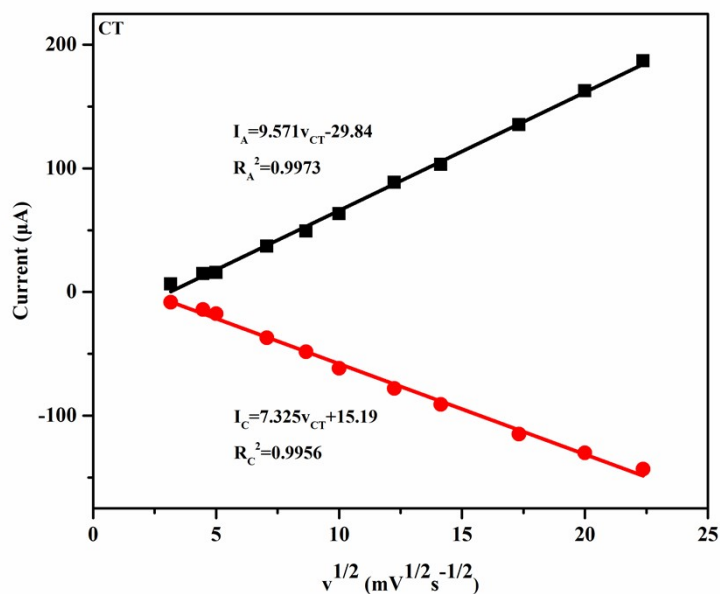

**Fig. S10.** The plots of redox peak currents ( $I_p$ ) versus the square root of scan rate.



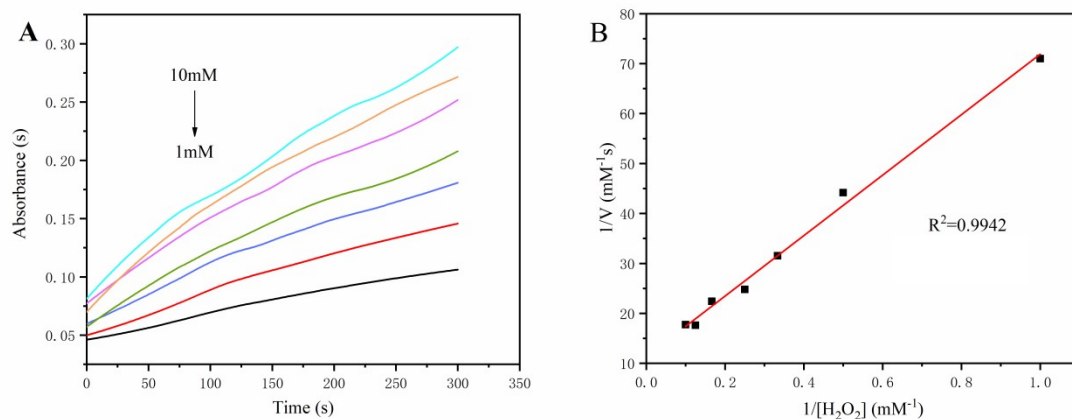

**Fig. S11.** (A) Time-dependent absorbance changes of TMB oxidation catalyzed by variable concentrations of H<sub>2</sub>O<sub>2</sub> in the presence of E-Z-800. (B) Relation curve of the reciprocal of H<sub>2</sub>O<sub>2</sub> concentration and the reciprocal of reaction rate.

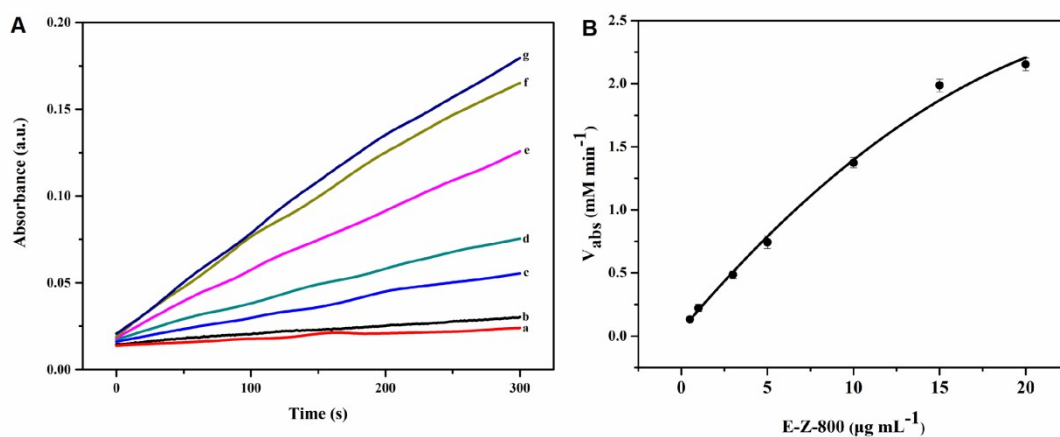

**Fig. S12.** (A) Time-dependent absorbance changes of TMB oxidation catalyzed by H<sub>2</sub>O<sub>2</sub> in the presence of variable concentrations of E-Z-800. (B) Relation curve of the concentrations of E-Z-800 and the reaction rate.

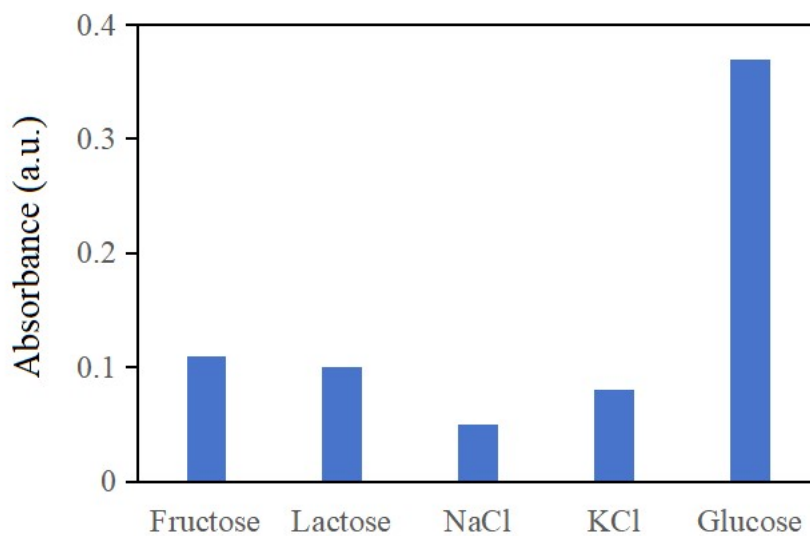

**Fig. S13.** Changes of absorbance signals for glucose, fructose, lactose, NaCl and KCl respectively.

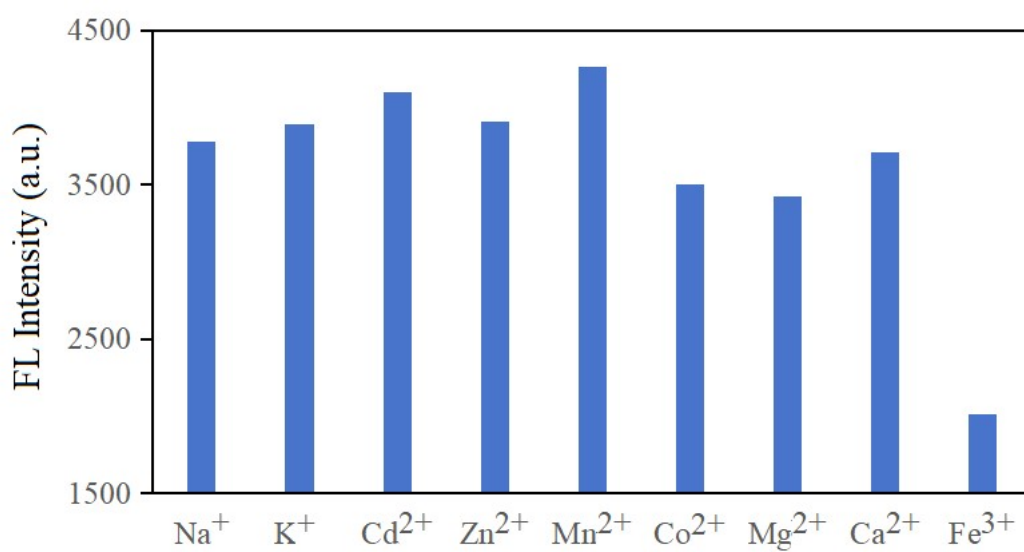

**Fig. S14.** Changes of FL intensities for Na<sup>+</sup>, K<sup>+</sup>, Cd<sup>2+</sup>, Zn<sup>2+</sup>, Mn<sup>2+</sup>, Co<sup>2+</sup>, Mg<sup>2+</sup>, Ca<sup>2+</sup> and Fe<sup>3+</sup> respectively.
